# Supplementary material
Source: Springer Nature journal article supplement (https://www.springermedizin.de/resource/supplementary/12879_2013_2416_MOESM3_ESM.pdf/9444506)
Supplement: MOESM3 [file 9444506]

### Additional file 3 – ICD-10 discharge diagnoses according to LRTI manifestation group

|                                               | No infiltrate and no bacteraemia patients | Infiltrate without bacteraemia patients | Bacteraemia patients      | Total     |
|-----------------------------------------------|-------------------------------------------|-----------------------------------------|---------------------------|-----------|
| Discharge diagnosis                           | n (%) – nCPD <sup>a</sup>                 | n (%) – nCPD <sup>a</sup>               | n (%) – nCPD <sup>a</sup> | n (%)     |
| <b>Discharge diagnosis of acute LRTI</b>      | 107 (55) - 69                             | 181 (72) - 88                           | 198 (76) - 51             | 486 (69)  |
| DA403 (Pneumococcal bacteraemia) <sup>b</sup> | 1 (1) - 0                                 | 2 (1) - 1                               | 58 (22) - 12              | 61 (9)    |
| DJ13 (Pneumococcal pneumonia)                 | 9 (5) - 4                                 | 39 (16) - 17                            | 43 (16) - 6               | 91 (13)   |
| DJ180 (Bronchopneumonia)                      | 1 (1) - 1                                 | 1 (0) - 1                               | 0 (0) - 0                 | 2 (0)     |
| DJ181 (Lobar pneumonia)                       | 0 (0) - 0                                 | 1 (0) - 1                               | 2 (1) - 0                 | 3 (0)     |
| DJ188 (Other pneumonia unspecified)           | 0 (0) - 0                                 | 1 (0) - 1                               | 0 (0) - 0                 | 1 (0)     |
| DJ189 (Pneumonia unspecified)                 | 38 (20) - 18                              | 101 (40) - 38                           | 82 (31) - 25              | 221 (31)  |
| DJ20 (Acute bronchitis)                       | 2 (1) - 1                                 | 0 (0) - 0                               | 1 (0) - 0                 | 3 (0)     |
| DJ22 (Acute LRTI, unspecified)                | 1 (1) - 1                                 | 5 (2) - 2                               | 3 (1) - 0                 | 9 (1)     |
| DJ440 (COPD with acute LRTI)                  | 18 (9) - 14                               | 8 (3) - 8                               | 1 (0) - 1                 | 27 (4)    |
| DJ441 (COPD with acute exacerbation)          | 37 (19) - 30                              | 23 (9) - 19                             | 8 (3) - 7                 | 68 (10)   |
| <b>No acute LRTI discharge diagnosis</b>      | 86 (45) - 43                              | 69 (28) - 26                            | 64 (24) - 7               | 219 (31)  |
| <b>Total</b>                                  | 193 (100) - 112                           | 250 (100) - 114                         | 262 (100) - 58            | 705 (100) |

LRTI, lower respiratory tract infection; CPD, Chronic Pulmonary Disease as defined in the Charlson Comorbidity Index (ICD-8: 490-493, 515-518. ICD-10: DJ40-DJ47, DJ60-DJ67, DJ68.4, DJ70.1, DJ70.3, DJ84.1, DJ92.0, DJ96.1, DJ98.2, DJ98.3).

<sup>a</sup> Data are n (% of all in the manifestation group) – number (n) of patients with CPD in the manifestation group with the respective ICD-10 diagnosis.

<sup>b</sup> Only patients with concomitant LRTI symptoms and/or pulmonary infiltrate were considered in this group.

For all patients we reviewed their ICD-10 discharge diagnoses to see if they had one of the above diagnoses as their primary diagnosis. For those who did not have a primary acute LRTI diagnosis, we looked if they had an acute LRTI diagnosis as their secondary diagnosis. If they had neither, they were placed in the category “no acute LRTI discharge diagnosis”.
